TRAUMATIC BRAIN INJURY-ASSOCIATED MICROGLIA ADOPT LONGITUDINAL  
TRANSCRIPTIONAL CHANGES CONSISTENT WITH LONG-TERM DEPRESSION OF  
SYNAPTIC STRENGTH

Hadijat M. Makinde<sup>1</sup>, Talia B. Just<sup>1</sup>, Deborah R. Winter<sup>2¶</sup>, Steven J. Schwulst<sup>1\*¶</sup>

<sup>1</sup> Department of Surgery, Division of Trauma and Critical Care, Northwestern University, Chicago, Illinois, United States of America

<sup>2</sup> Department of Medicine, Division of Rheumatology, Northwestern University, Chicago, Illinois, United States of America

\* Corresponding author

E-Mail: [s-schwulst@northwestern.edu](mailto:s-schwulst@northwestern.edu)

¶ SJS and DP are Joint Senior Authors

1 Traumatic brain injury (TBI) is an under-recognized public health threat. Even mild brain  
2 injury, or concussions, may lead to long-term neurologic impairment. Microglia play a  
3 fundamental role in the development and progression of this subsequent neurologic  
4 impairment. Despite this, a microglia-specific injury signature has yet to be identified. In  
5 the current study we hypothesized that TBI-associated microglia would adopt longitudinal  
6 changes in their transcriptional profile associated with pathways linked to the  
7 development of motor, cognitive, and behavioral disorders. C57BL/6 mice underwent TBI  
8 via a controlled cortical impact and were followed longitudinally. FACSsorted microglia  
9 from TBI mice were subjected to RNA-sequencing at 7, 30, and 90 days post-injury. We  
10 identified 4 major patterns of gene expression corresponding to the host defense  
11 response, synaptic potentiation, lipid remodeling, and membrane polarization. In  
12 particular, significant upregulation of genes involved in long-term synaptic potentiation  
13 including Ptpn5, Shank3, and Sqstm1 were observed offering new insight into a  
14 previously unknown role of microglia in the weakening of synaptic efficacy between  
15 neurons after brain injury.

16

## 17 **Introduction**

18 Traumatic brain injury is a growing and under recognized public health threat. The CDC  
19 estimates nearly 2 million people sustain a traumatic brain injury (TBI) each year in the  
20 United States, contributing to over 30% of all injury related deaths <sup>1,2</sup>. In fact, TBI related  
21 healthcare expenditures near 80 billion dollars annually with an average cost of 4 million  
22 dollars per person surviving a severe TBI <sup>3-5</sup>. The impact of TBI is highlighted not only by  
23 its high mortality rate but also by the significant long-term complications suffered by its

24 survivors with the progressive development of motor, cognitive, and behavioral disorders  
25 <sup>6-10</sup>. Even subconcussive events, those resulting in subclinical brain dysfunction without  
26 the typical symptoms of concussion, may lead to long-term neurologic impairment <sup>11,12</sup>.  
27 The immune response to TBI plays a fundamental role the development and progression  
28 of subsequent neurodegenerative disease and represents a complex interplay between  
29 the injured brain and the resident immune cells of the brain — the microglia <sup>13</sup>. The current  
30 manuscript is focused on developing a cell-type-specific understanding of the microglial  
31 response to injury over time. Here we highlight the major trends in gene expression in  
32 response to TBI.

33  
34 TBI triggers a robust pro-inflammatory response within the injured brain. The degree of  
35 this initial pro-inflammatory response has significant value in predicting more long-term  
36 outcomes after TBI <sup>14-16</sup>. Even after the acute inflammatory response has resolved,  
37 several studies demonstrated residual long-lasting inflammation within the brain in both  
38 animal models as well as in patients <sup>17,18</sup>. One of the main drivers of this continued  
39 inflammation is the persistence of activated microglia—characterized by thickening and  
40 retraction of their ramified processes, increased IL-1 and IL-6 with concomitant decreases  
41 in IL-4 and IL-10, and increased expression of pro-oxidant genes with a reduction of  
42 growth and antioxidant genes. A recent study showed an increased inflammatory profile  
43 of microglia that persisted for up to 12 months after injury in a murine model of TBI <sup>19</sup>.  
44 Furthermore, this continued inflammation is associated with lesion volume expansion and  
45 loss of neurons in the hippocampus <sup>18-22</sup>. Even once the acute inflammatory process has  
46 resolved and infiltrated monocyte-derived macrophages are no longer present within the

47 injured brain, microglia have the potential to remain activated for years after the initial  
48 insult<sup>19,23</sup>. A functional consequence of this constitutive activation after brain trauma is  
49 an exaggerated neuroinflammatory response to otherwise benign secondary stimuli such  
50 a subsequent subclinical head injury<sup>10,24-27</sup>. This may be the mechanism by which  
51 patients who have sustained a concussion are more susceptible to subsequent  
52 concussions<sup>28-30</sup>. Nonetheless, the molecular mechanisms resulting in the constitutive  
53 activation of microglia remain elusive<sup>21</sup>. Therefore, in the current study, we aimed to  
54 study the transcriptional dynamics of constitutively activated microglia over the course of  
55 brain injury.

56  
57 The first step towards any cell-specific transcriptional analysis relies on obtaining  
58 sufficient cells of interest with the highest purity. The historical standard for distinguishing  
59 between microglia and infiltrating macrophages is immunohistochemistry. Although  
60 immunohistochemistry is useful for assessing morphology, proliferation, and sites of  
61 activation it has a number of drawbacks limiting its use<sup>31</sup>. Several investigative groups  
62 have focused on this problem including column free magnetic separation and CD11b  
63 immunomagnetic enrichment combined with the differential expression of CD45 with flow  
64 cytometry<sup>31-33</sup>. However, CD45 expression has been reported to vary depending on the  
65 pathologic condition; thus, reliable separation of microglia from peripheral myeloid cells  
66 is impaired<sup>34,35</sup>. To overcome this issue, fluorescently marked myeloid cells, such as  
67 CX3CR1<sup>+/GFP</sup>/CCR2<sup>+/RFP</sup>, have been used. However, these mice are on mixed  
68 backgrounds, which could greatly affect the immune response. Furthermore, the  
69 presence of contaminated nonclassical monocytes could not be excluded<sup>36,37</sup>. Therefore,

70 we use head-shielded bone marrow chimeric mice with CD45.1 cells in the circulation  
71 and CD45.2 microglia in the brain allowing definitive and unambiguous differentiation  
72 between microglia and infiltrating bone-marrow derived myeloid cells as previously  
73 described by our laboratory<sup>38</sup>. To the best of our knowledge, no cell-type-specific study  
74 has been conducted to specifically identify transcriptional changes in isolated populations  
75 of microglia over the course of TBI. In the current study we demonstrate that TBI-  
76 associated microglia adopt longitudinal changes in their transcriptional profile associated  
77 with pathways linked to the development of motor, cognitive, and behavioral disorders.

78

## 79 **Results**

### 80 **Global patterns of gene expression from isolated populations of** 81 **microglia over the time course of TBI**

82 The neuroinflammatory response to TBI is central to both neuroprotection and  
83 neurotoxicity after injury, but attempts to broadly target immune activation have been  
84 unsuccessful in improving outcomes in TBI patients<sup>39-42</sup>. Because of this, there has been  
85 a growing interest in investigating the microglial transcriptome after brain injury. Attempts  
86 thus far have been plagued by the use of whole brain homogenates rather than individual  
87 cell types as well as the use of microarray analyses restricted to a limited number of genes  
88 in the inflammatory response<sup>43,44</sup>. Therefore, we combined our ability to discriminate and  
89 sort microglia from infiltrating monocytes and macrophages with unbiased transcriptional  
90 profiling (RNA-seq) on FACSsorted microglia from 7, 30, and 90 days after TBI. We  
91 defined 396 genes that change expression across the time course (see methods). We  
92 clustered these differentially expressed genes into 4 main patterns of expression (**Fig. 1**).

93 Clusters 2 represents genes involved in synaptic plasticity and is progressively  
 94 upregulated over the course of injury. Cluster 4 represents genes involved in the  
 95 regulation of membrane polarization with gene expression that is upregulated at 30 days  
 96 post-injury and then downregulated by 90 days post injury. Clusters 1 and 3 represent  
 97 genes involved in the host response to injury and lipid remodeling and both are  
 98 progressively downregulated over the course of injury. These data provide new insights  
 99 into the biology of microglial activation over the course of TBI.

100

101 **Figure 1. Microglia from TBI mice show distinct time-dependent transcriptional**  
 102 **profiles.** K-means clustering: Four clusters representing 392 genes are shown with  
 103 distinct time specific expression patterns. Averaged  $\log_2(\text{CPM}+1) \geq 3$  of genes in each

104 group that had a log fold  
 105 change of at least 2 was  
 106 used to generate the heat  
 107 map. GO processes  
 108 associated with the genes  
 109 in each cluster was  
 110 determined using Gorilla  
 111 database.

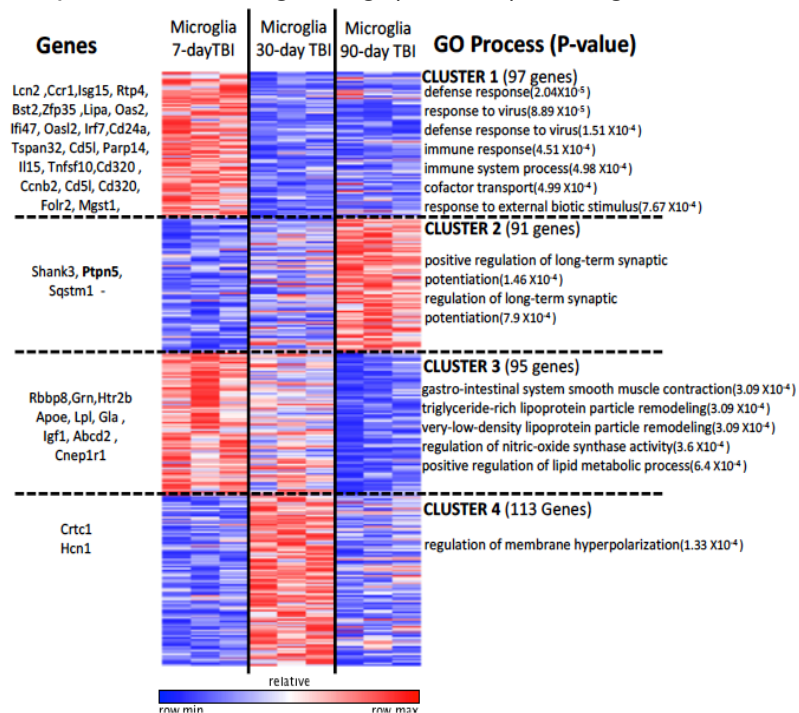

112

113  
 114 **Pairwise comparison of microglia gene expression between time**  
 115 **points post-TBI**

116 To further evaluate the gene expression over time in TBI-associated microglia, we  
117 investigated differentially expressed genes between microglia across time points (**Fig. 2**).  
118 We found 187 genes between days 7 and 30 that are positively differentiated and are  
119 likely involved in channel transport activity, as well as defense response. Several genes  
120 including genes involved in immune response and tissue repair such as *Tnfsf10*, *Bst2*,  
121 *Igf1*, and *Ccr1* were upregulated at the earlier time points. However, genes implicated in  
122 neurodegenerative diseases such as *Ptpn5*, *Shank3*, and *Sqstm1* were upregulated by  
123 90 days compared to 7 days post TBI. This expression profile is indicative of the chronic  
124 inflammatory environment in the TBI brain following injury. To determine whether gene  
125 expression trends at 30 days were predictive of 90 days post-TBI, we compared the fold  
126 changes between 7 vs. 30 days post-TBI with those between 7 vs. 90 days post-TBI (**Fig.**  
127 **3**). We find that these gene expression change were significantly correlated ( $R=-0.537$ ,  
128  $p=2.2 \times 10^{-16}$ ). This indicates that genes which were upregulated at 90 days post-TBI had  
129 already started to increase as early as 30 days post-injury. Conversely, those genes that  
130 were downregulated at 30 days post-TBI remained downregulated or continued to fall  
131 over time.

132

133 **Figure 2: Differentially**  
134 **expressed genes over the**  
135 **time course of injury.**

136 Volcano plots of differentially  
137 expressed genes in microglia  
138 between 7D and 30D post-TBI

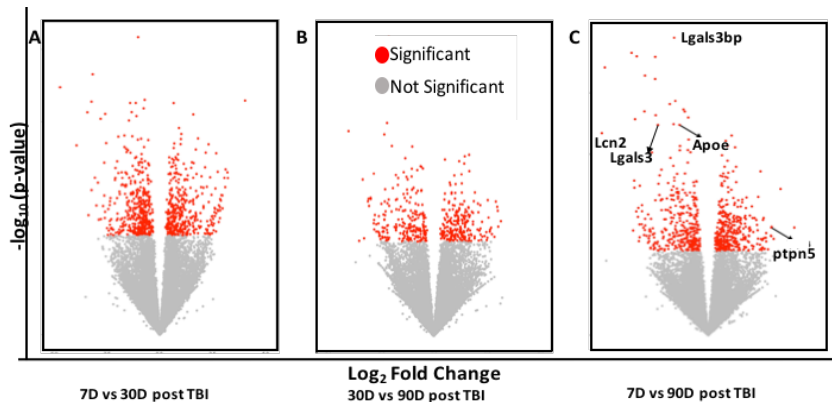

139 (A), 30D and 90D post-TBI (B), and 7D and 90D post-TBI (C). N=3 in each group. Genes  
140 with a p-value  $<0.05$  are shown in red.

141

142 **Figure 3. Scatter plot of fold change in CPM of microglia over time after TBI.** Scatter  
143 plot to examine the relationship between the genes that are up-regulated or down-  
144 regulated in the microglia of mice at A) 7 vs 30 days post-TBI compared to 7 vs 90 days  
145 post-TBI and at B) 30 vs 90 days post-TBI compared to 7 vs 90 days. A log2 fold change  
146 of 1 is equal to a 2-fold change.

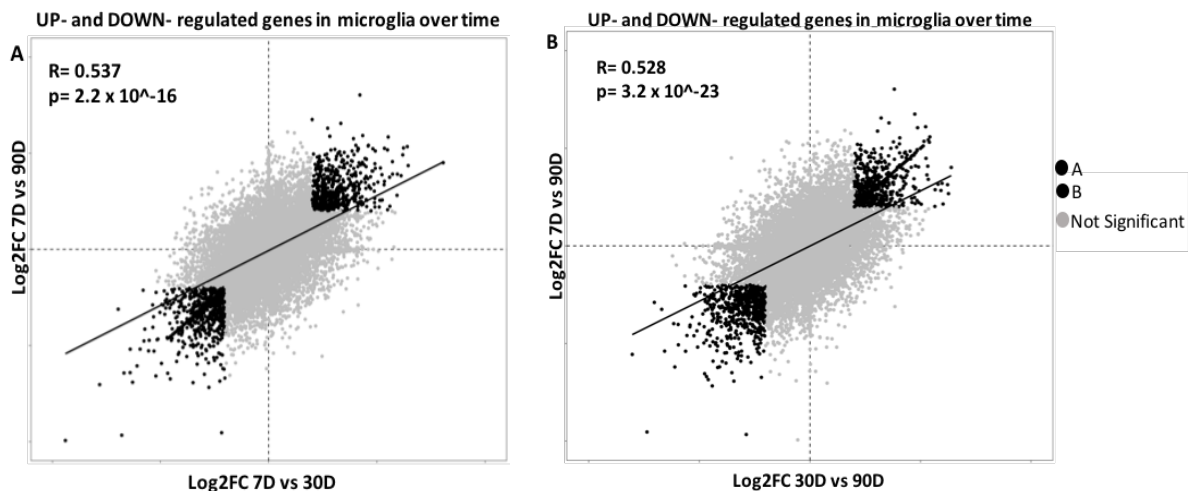

147

148 **Trem2-APOE pathway is not upregulated over the course of traumatic**  
149 **brain injury.**

150 Microglia are essential to brain homeostasis but lose this homeostatic function in a  
151 number of neurodegenerative disease processes. There has been considerable interest  
152 in the Trem2-APOE pathway in the generation of a neurodegenerative microglial  
153 phenotype in both Alzheimer's Disease (AD) and multiple sclerosis (MS). In fact, recent  
154 data has identified the Trem2-APOE pathway as a pivotal regulator of microglial



155 phenotype in both of these disease processes<sup>45</sup>. Therefore, we aimed to determine if the  
156 Trem2-APOE pathway was a major regulator of microglial phenotype after TBI. However,  
157 unlike other neurodegenerative processes, our data demonstrates no significant change  
158 in TREM2 expression as well as a progressive decrease in APOE expression over the  
159 course of TBI (**Fig. 4**). These seemingly contradictory results emphasize the need for  
160 microglia-specific transcriptional studies in the setting TBI.

161

162 **Figure 4. Microglial Trem2 and APOE expression over the course of TBI.** Microglial

163 Trem2 did not significantly change

164 over the course of brain injury.

165 APOE expression progressively

166 decreased over time following TBI.

167 Ordinary one way ANOVA with

168 Bonferroni's multiple comparison

169 test.

170

171 **Microglial STEP expression is progressively upregulated over the**  
172 **course of brain injury.**

173 While our data failed to demonstrate a common pathway with Alzheimer's disease and

174 multiple sclerosis through Trem2-APOE, a closer examination of Cluster 2 (**Fig. 1**) revealed

175 a number of upregulated genes associated with long-term synaptic potentiation, including PTPN5

176 also known as STEP (STriatal-Enriched protein tyrosine Phosphatase). STEP is a brain-specific

177 phosphatase and is highly expressed within the cortex, hippocampus, and amygdala<sup>46,47</sup>. Our

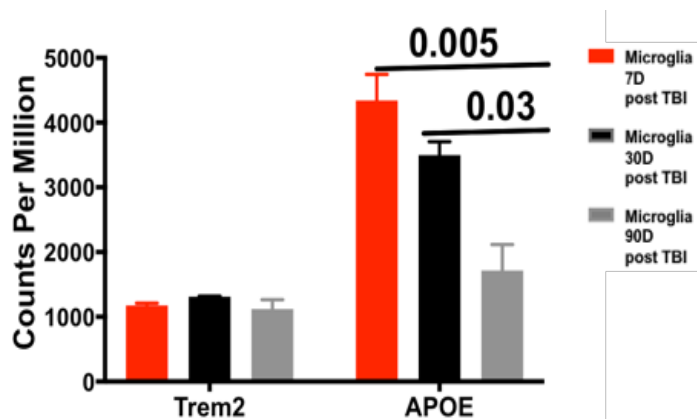

170

178 data show that expression of STEP is progressively increased in microglia over time following TBI  
179 (**Fig. 5**). STEP is critical in the long-term depression, or weakening, of synaptic efficacy between  
180 neurons—a process fundamental to learning, memory, and cognition<sup>48,49</sup>. When STEP activity is  
181 elevated, several substrates are inactivated resulting in the internalization of NMDA/AMPA  
182 glutamate receptors<sup>50</sup>. This disrupts synaptic function and contributes to cognitive deficits<sup>49,51</sup>.  
183 In fact, elevated STEP is associated with the pathophysiology of Alzheimer's disease,  
184 schizophrenia, and ischemic brain injury in both human cortex and mouse models<sup>52-57</sup>. These  
185 data suggest that STEP may be one of the common molecular pathways connecting TBI with  
186 other known neurodegenerative disorders.

187

188 **Figure 5. Microglial STEP expression is**  
189 **progressively upregulated over the course**  
190 **of brain injury.** STEP expression from  
191 FACSsorted microglia progressively increased  
192 from 7 days post-TBI to 90 days post-TBI;  
193  $p=0.01$ , Ordinary one way ANOVA with  
194 Bonferroni's multiple comparison test.

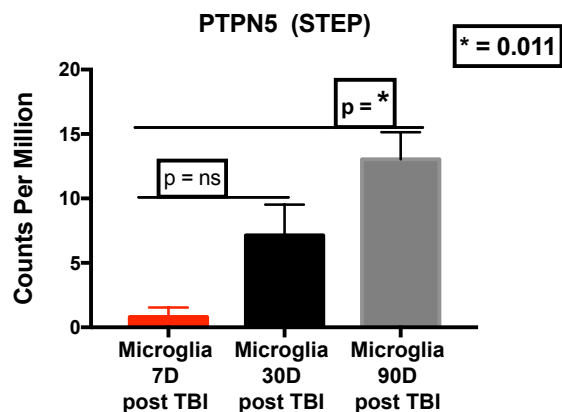

195

## 196 Discussion

197 Microglia are the resident innate immune cells of the CNS. They are ontologically distinct  
198 from peripheral bone marrow-derived monocytes and macrophages, arising from the yolk  
199 sac as opposed to the developing liver in the embryo<sup>58</sup>. In fact, microglia rely on a  
200 distinctive set of transcription factors during development resulting in a lineage of tissue  
201 macrophages (microglia) derived from the yolk sac that are genetically distinct from bone

202 marrow-derived macrophages<sup>37,59-62</sup>. Additionally, microglia are self-renewing suggesting  
203 that monocyte-derived macrophages do not contribute to the maintenance of the mature  
204 microglia pool<sup>63,64</sup>. Distinct developmental origin and renewal mechanisms may suggest  
205 that microglia possess discrete functions in pathological processes<sup>58</sup>. Despite this, the  
206 cellular mechanisms by which microglia promote or attenuate the progression of injury  
207 are largely unknown<sup>65</sup>. Our Data are the first we know of to use unbiased transcriptional  
208 profiling of isolated populations of microglia to define the genes/pathways/signatures  
209 involved in the generation of TBI-associated microglia over the course of injury.

210  
211 To adequately capture the heterogeneity and complexity of microglia at different stages  
212 of injury, a comprehensive, genome-wide sampling of individual cell types is required<sup>37,66</sup>.  
213 A cell-specific delineation of innate immune function based on transcriptional profiling in  
214 TBI has yet to be undertaken. Therefore, we combined our ability to discriminate and sort  
215 microglia from infiltrating monocytes and monocyte-derived macrophages with unbiased  
216 transcriptional profiling (RNA-seq) on FACSorted microglia. Our analysis identified 4  
217 sequentially upregulated or downregulated gene clusters involved in processes such as  
218 the host defense response, synaptic potentiation, lipid remodeling, and membrane  
219 polarization each providing new insights into the biology of microglial activation over the  
220 course of TBI (**Fig. 1**). While there has recently been considerable recent interest in the  
221 Trem2-APOE pathway in the generation of a neurodegenerative microglial phenotype in  
222 Alzheimer's Disease and multiple sclerosis<sup>45</sup>, our data demonstrates no significant  
223 change in Trem2 expression as well as a progressive decrease in APOE expression over  
224 the course of TBI (**Fig. 4**). However, an examination of cluster II revealed a number of

225 genes associated with long-term synaptic potentiation, including PTPN5 also known as  
226 STEP (STriatal-Enriched protein tyrosine Phosphatase). STEP is a brain-specific  
227 phosphatase that is highly expressed within the striatum, cortex, hippocampus, and  
228 amygdala <sup>46,47</sup>. STEP is critical in the long-term depression, or weakening, of synaptic  
229 efficacy between neurons—a process fundamental to learning, memory, and cognition  
230 <sup>48,49</sup>. Elevated STEP is associated with the pathophysiology of Alzheimer’s disease (AD),  
231 schizophrenia, and ischemic brain injury in both human cortex and mouse models <sup>52-57</sup>.  
232 In fact, genetic knockout of STEP reverses many of the cognitive and behavioral deficits  
233 in AD models <sup>53,67</sup>. To the best of our knowledge, STEP expression has never been  
234 studied within the context of TBI. Our RNA-seq analysis demonstrates a 13-fold increase  
235 in microglial expression of STEP over the course of injury (**Fig. 5**). Previous studies have  
236 shown that STEP affects neuronal communication by opposing synaptic strengthening.  
237 High levels of STEP are believed to disrupt synaptic function and to contribute to learning  
238 deficits in neurodegenerative disease <sup>52,68</sup>. When STEP activity is elevated, several  
239 substrates are inactivated resulting in the internalization of NMDA/AMPA glutamate  
240 receptors <sup>50</sup>. This disrupts synaptic function and contributes to cognitive deficits <sup>49,51</sup>. In  
241 other words, STEP activation modulates learning and memory by removing glutamate  
242 receptors from synaptic membranes. This important discovery suggests that TBI may  
243 share a common molecular pathway with several other cognitive disorders previously  
244 regarded as distinct. These data are remarkable in demonstrating the power of  
245 longitudinal transcriptional profiling, which provides important biologic insights into the  
246 state of microglial processes even in the complex and dynamic model of traumatic brain

247 injury. Furthermore, these data strongly implicate longitudinal changes in microglial gene  
248 expression in the development of long-term neurocognitive changes.

249

250 In conclusion, our data demonstrate that TBI-associated microglia adopt longitudinal  
251 transcriptional changes consistent with long-term depression of synaptic strength. The  
252 contribution of altered microglial gene expression to the pathogenesis of TBI has not been  
253 previously investigated. Our data suggest that TBI-associated microglia may play a  
254 previously unknown role in the weakening of synaptic efficacy between neurons after  
255 brain injury. As a result, learning, memory, and cognitive performance may all be affected  
256 leading to the resultant long-term neurocognitive impairments seen after TBI. Moving  
257 forward it will be important to study larger cohorts of brain-injured mice during both the  
258 acute and chronic phase of TBI. Furthermore, it has been shown that microglia display  
259 different transcriptional identities depending on the brain region in which they reside as  
260 well as their age<sup>69</sup>. This will necessitate side-by-side comparison with age-matched naïve  
261 control mice to account for transcriptional changes associated with aging. Additionally, a  
262 single-cell RNA-seq approach may be required to account for inherent microglial  
263 heterogeneity at the site of injury. This could allow for the identification of novel microglial  
264 subpopulations within and surrounding the site of injury. Regardless of the techniques  
265 used, once the molecular mechanisms underlying the transcriptional changes in microglia  
266 after injury are further delineated, targeting the microglial response after TBI may soon  
267 represent a target for future therapeutic intervention.

268

269 **Methods**

## 270 **Mice**

271 All procedures were approved by the Northwestern University Institutional Animal Care  
272 and Use committee and all experiments were carried out in accordance with the ARRIVE  
273 guidelines on the reporting of in vivo experiments. Two mouse strains were used, they  
274 are C57BL/6 and B6.SJL-*Ptprc<sup>a</sup> Pepc<sup>b</sup>*/BoyJ (CD45.1). All mice were purchased from the  
275 Jackson Laboratory and housed at a barrier facility at the Center for Comparative  
276 Medicine at Northwestern University (Chicago, IL, USA). Sixteen-week-old mice were  
277 used for all experiments.

## 278 **Shielded Bone Marrow Chimeras**

279 Bone marrow was aseptically harvested from tibias and femurs, from 8-week-old  
280 B6.CD45.1 donor mice, erythrocytes were lysed and the cells were counted using a  
281 Countess automated cell counter. 8 weeks old B6.*CD45.2* mice received a single 1000-  
282 cGy  $\gamma$ -irradiation dose using a Cs-137-based Gammacell 40 irradiator. The mice heads  
283 were shielded with a lead bar so as to deliver the irradiation to the body only. 6 hours  
284 after shielded irradiation, busulfan (30 mg/kg) was administered to completely ablate the  
285 bone marrow of the recipient mice. Donor bone marrow (CD45.1) was transplanted 12  
286 hours after busulfan ablation. Shielded bone marrow chimeras were maintained on  
287 antibiotics trimethoprim/sulfamethoxazole (40 mg/5 mg, respectively). Eight weeks after  
288 irradiation, 95% of the circulating monocytes were of donor origin (**Fig. 6**)<sup>38</sup>.

289

290 **Figure 6. Microglia from head-shielded bone marrow chimeric mice are host origin.**

291 Brains isolated from chimeric mice post TBI were analyzed by flow cytometry. CD45.1<sup>neg</sup>

292 'B, T, NK cells, Eosinophils' acted as the gating control for CD45.2<sup>hi</sup>, showing that resident

293 microglia (CD45<sup>lo</sup>)

294 can be

295 unambiguously

296 differentiated from

297 infiltrating monocyte-

298 derived macrophages

299 (CD45.1<sup>+</sup>). Arrows

300 indicated the

301 directionality of gating.

302

303 **Controlled cortical impact**

304 Controlled cortical impact was induced as previously described by our laboratory<sup>38</sup>. In

305 brief, mice were anesthetized with 100 mg/kg Ketamine and 10 mg/kg Xylazine via

306 intraperitoneal injection. A 1cm scalp incision was performed and a 5mm craniectomy

307 was performed 2 mm left of the sagittal suture and 2 mm rostral to the coronal suture.

308 The dura was left intact. Mice were then placed in a stereotaxic operating frame and the

309 impactor (Leica Biosystems Inc., Buffalo Grove, IL) was maneuvered into position. A

310 controlled cortical impact was then applied with a 3mm impacting tip at a velocity of 2.5m/s

311 and an impacting depth of 2mm with the dwell time set at 0.1s. Immediately following

312 injury all animals had their scalps sealed with VetBond (3M). All animals received post

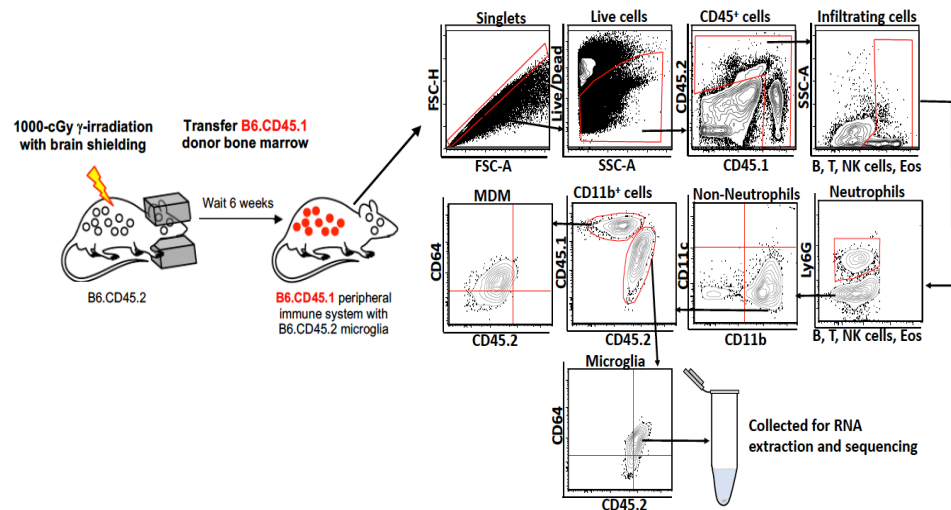

313 injury analgesia with Buprenorphine SR via subcutaneous injection and were allowed to  
314 recover in separate cages over a warming pad. Mice were euthanized at 7, 30, and 90  
315 days post TBI and brains were harvested.

316

### 317 **Tissue preparation and fluorescence activated cell sorting**

318 Immediately following euthanasia, mice were transcardially perfused first with ice cold PBS.  
319 The brains were then excised and place in ice cold HBSS until time to process. The brains  
320 were weighed, cut into pieces and placed into C-tubes containing digestion buffer (2.5  
321 mg/mL Liberase TL (Roche, Basel, Switzerland), and 1 mg/mL of DNase I in HBSS). The  
322 C-tubes were placed on a MACS dissociator (Miltenyi Biotec) and run on the M\_Brain\_3  
323 protocol, after which they were placed in an incubator for 30 minutes at 37°C with shaking  
324 at 200 rpm. After incubation, the C-tubes were placed back on the MACS dissociator and  
325 run on the same protocol as before. The cells released were then passed through a 40 µm  
326 nylon mesh and washed with 100ml of wash buffer (1% BSA in HBSS) per brain sample.  
327 Microglia and infiltrating cells were isolated using a 30/70 percoll gradient (Percoll Plus, GE  
328 Healthcare). The cells collected from the interphase of the gradient were washed with  
329 HBSS and counted using Countess automated cell counter (Invitrogen); dead cells were  
330 discriminated using trypan blue. Cells were stained with live/dead Aqua (Invitrogen) viability  
331 dye, incubated with Fc-Block (BD Bioscience) and stained with fluorochrome-conjugated  
332 antibodies (**Table 1**). Data were acquired on a BD FACSAria cell sorter (BD Biosciences,  
333 San Jose, CA), and microglia were sorted for further analyses. “Fluorescence minus one”  
334 controls were used when necessary to set up gates. Pelleted sorted cells were immediately  
335 lysed in extraction buffer from a PicoPure RNA isolation kit (Arcturus Bioscience), and



336 lysates were stored at -80°C until RNA was extracted. Analysis of the flow cytometric data  
337 was performed using Flowjo software (TreeStar, Ashland, OR).  
338

| Antibody  | Fluorochrome                                  | Company and Clone        |
|-----------|-----------------------------------------------|--------------------------|
| CD45.1    | FITC                                          | A-20 / BD Bioscience     |
| CD45.2    | BV421                                         | 104 / Biolegend          |
| CD64      | APC                                           | X54-5/7.1/ BD Bioscience |
| CD11b     | APC- Cy7                                      | M1/70 / BD Biosciences   |
| CD11c     | PE-Cy7                                        | HL3 / BD Bioscience      |
| Ly6G      | Alexa Flour 700                               | 1A8 / BD Bioscience      |
| MHC II    | Percp- Cy 5.5                                 | M5/114.15.2 / Biolegend  |
| Siglec H  | PE                                            | 551 / Biolegend          |
| B220      | PECF594                                       | RA3-6B2 / BD Bioscience  |
| Siglec F  | PECF594                                       | E50-2440 / BD Bioscience |
| CD4       | PECF594                                       | RM4-5/ BD Bioscience     |
| CD8       | PECF594                                       | 53-6.7 / BD Bioscience   |
| NK1.1     | PECF594                                       | PK136/ BD Bioscience     |
| Viability | e-bioscience Fixable Viability Dye eFluor 506 | Invitrogen               |

339 **Table 1.** List of antibody conjugated fluorochromes used to differentiate microglia from  
340 infiltrating leukocytes.

341

## 342 RNA sequencing

343 RNA from the FACSorted microglia of brain-injured mice were extracted using a PicoPure  
344 RNA isolation kit according to manufacturer's instructions. Sample quality control,  
345 processing, and library preparation were performed by the Northwestern University Next  
346 Generation Sequencing Core (NUSeq). RNA quality and quantity were measured using  
347 Agilent High Sensitivity RNA ScreenTape System (Agilent Technologies). RNA  
348 sequencing (RNA-seq) libraries were prepared from 3ng of total RNA using the QuantSeq  
349 3' biased mRNA-seq Library Prep Kit for Illumina (Lexogen). DNA libraries were

350 sequenced on an Illumina NextSeq 500 instrument with a target read depth of ~20 million  
351 reads per sample.

352

### 353 **RNA-seq analysis**

354 Raw sequencing files were first de-multiplexed using bcl2fastq. The resulting fastq files  
355 were trimmed of low-quality reads and bases, polyA tails, and adaptors using bbduk  
356 (<http://jgi.doe.gov/data-and-tools/bb-tools/>). The trimmed fastq files were aligned to the  
357 mouse reference genome (mm10, Genome Reference Consortium GRCm38) using the  
358 STAR (Spliced Transcripts Alignment to a Reference) algorithm <sup>70</sup>. HTSeq was run on  
359 the resulting BAM files to provide raw gene counts. Raw gene counts for each sample  
360 were merged into a single gene expression table and normalized for read depth using  
361 counts per million (CPM). The three highest quality samples, based on RNA quality and  
362 library quality from each experimental group were included for subsequent analyses. For  
363 the RNA-seq analysis, we focused on the expressed genes which were defined as average  
364 log CPM ( $\log_2(\text{CPM}+1)$ ) expression  $> 4$  in each experimental group. For visualization, GENE-E  
365 (<https://software.broadinstitute.org/GENE-E/>) was used to perform K-means clustering  
366 (K=4) on differentially expressed genes across all time points as defined by ANOVA test  
367 ( $p < 0.05$ ) across any two groups shown in the heatmap. Gene Ontology associations and  
368 the related p-values were determined by GO analysis (by GOrilla— [Gene Ontology  
369 enrichment *anaLysis* and visualiZation tool]).

370 <sup>71</sup>. Pairwise differential genes between time points were determined using DEseq2.  
371 Volcano plots were generated using the log2 fold change of normalized gene counts  
372 between microglia at different time points on the x-axis and corresponding p-values (-

373 log10) from DEseq2 on the y-axis. Plots were generated using the ggplot2 package from  
374 R Studio software.

375

## 376 **Data Availability**

377 The data that support the findings of this study are available from the corresponding  
378 author on request. RNA sequencing data is available through the NCBI Sequence  
379 Read Archive (SRA accession number: SRP160379).

380

## 381 **References**

- 382 1 Faul, M. Traumatic Brain Injury in the United States: Emergency Department Visits,  
383 Hospitalizations and Deaths 2002-2006. (Centers for Disease Control and Prevention,  
384 National Center for Injury Prevention and Control, Atlanta (GA), 2010).
- 385 2 Roozenbeek, B., Maas, A. I. & Menon, D. K. Changing patterns in the epidemiology of  
386 traumatic brain injury. *Nat Rev Neurol* **9**, 231-236, doi:10.1038/nrneurol.2013.22 (2013).
- 387 3 Corso, P., Finkelstein, E., Miller, T., Fiebelkorn, I. & Zaloshnja, E. Incidence and lifetime  
388 costs of injuries in the United States. *Injury prevention : journal of the International  
389 Society for Child and Adolescent Injury Prevention* **12**, 212-218,  
390 doi:10.1136/ip.2005.010983 (2006).
- 391 4 Pearson, W. S., Sugerman, D. E., McGuire, L. C. & Coronado, V. G. Emergency  
392 department visits for traumatic brain injury in older adults in the United States: 2006-08.  
393 *The western journal of emergency medicine* **13**, 289-293,  
394 doi:10.5811/westjem.2012.3.11559 (2012).
- 395 5 Whitlock, J. A., Jr. & Hamilton, B. B. Functional outcome after rehabilitation for severe  
396 traumatic brain injury. *Archives of physical medicine and rehabilitation* **76**, 1103-1112  
397 (1995).
- 398 6 Schwarzbald, M. *et al.* Psychiatric disorders and traumatic brain injury. *Neuropsychiatric  
399 disease and treatment* **4**, 797-816 (2008).
- 400 7 Whelan-Goodinson, R., Ponsford, J., Johnston, L. & Grant, F. Psychiatric disorders  
401 following traumatic brain injury: their nature and frequency. *The Journal of head trauma  
402 rehabilitation* **24**, 324-332, doi:10.1097/HTR.0b013e3181a712aa (2009).
- 403 8 Peskind, E. R., Brody, D., Cernak, I., McKee, A. & Ruff, R. L. Military- and sports-related  
404 mild traumatic brain injury: clinical presentation, management, and long-term  
405 consequences. *The Journal of clinical psychiatry* **74**, 180-188; quiz 188,  
406 doi:10.4088/JCP.12011co1c (2013).

- 407 9 Martin, L. A., Neighbors, H. W. & Griffith, D. M. The experience of symptoms of  
408 depression in men vs women: analysis of the National Comorbidity Survey Replication.  
409 *JAMA psychiatry* **70**, 1100-1106, doi:10.1001/jamapsychiatry.2013.1985 (2013).
- 410 10 Makinde, H. M., Just, T. B., Cuda, C. M., Perlman, H. & Schwulst, S. J. The Role of  
411 Microglia in the Etiology and Evolution of Chronic Traumatic Encephalopathy. *Shock* **48**,  
412 276-283, doi:10.1097/SHK.0000000000000859 (2017).
- 413 11 Belanger, H. G., Vanderploeg, R. D. & McAllister, T. Subconcussive Blows to the Head: A  
414 Formative Review of Short-term Clinical Outcomes. *J Head Trauma Rehabil* **31**, 159-166,  
415 doi:10.1097/HTR.0000000000000138 (2016).
- 416 12 Carman, A. J. *et al.* Expert consensus document: Mind the gaps-advancing research into  
417 short-term and long-term neuropsychological outcomes of youth sports-related  
418 concussions. *Nat Rev Neurol* **11**, 230-244, doi:10.1038/nrneurol.2015.30 (2015).
- 419 13 Hernandez-Ontiveros, D. G. *et al.* Microglia activation as a biomarker for traumatic brain  
420 injury. *Front Neurol* **4**, 30, doi:10.3389/fneur.2013.00030 (2013).
- 421 14 Kumar, R. G. *et al.* Acute CSF interleukin-6 trajectories after TBI: associations with  
422 neuroinflammation, polytrauma, and outcome. *Brain Behav Immun* **45**, 253-262,  
423 doi:10.1016/j.bbi.2014.12.021 (2015).
- 424 15 Winter, C. D., Pringle, A. K., Clough, G. F. & Church, M. K. Raised parenchymal  
425 interleukin-6 levels correlate with improved outcome after traumatic brain injury. *Brain*  
426 **127**, 315-320, doi:10.1093/brain/awh039 (2004).
- 427 16 Thelin, E. P. *et al.* Monitoring the Neuroinflammatory Response Following Acute Brain  
428 Injury. *Front Neurol* **8**, 351, doi:10.3389/fneur.2017.00351 (2017).
- 429 17 Kumar, R. G., Boles, J. A. & Wagner, A. K. Chronic Inflammation After Severe Traumatic  
430 Brain Injury: Characterization and Associations With Outcome at 6 and 12 Months  
431 Postinjury. *The Journal of head trauma rehabilitation* **30**, 369-381,  
432 doi:10.1097/HTR.0000000000000067 (2015).
- 433 18 Smith, D. H., Johnson, V. E. & Stewart, W. Chronic neuropathologies of single and  
434 repetitive TBI: substrates of dementia? *Nature reviews. Neurology* **9**, 211-221,  
435 doi:10.1038/nrneurol.2013.29 (2013).
- 436 19 Loane, D. J., Kumar, A., Stoica, B. A., Cabatbat, R. & Faden, A. I. Progressive  
437 neurodegeneration after experimental brain trauma: association with chronic microglial  
438 activation. *J Neuropathol Exp Neurol* **73**, 14-29, doi:10.1097/NEN.0000000000000021  
439 (2014).
- 440 20 Lozano, D. *et al.* Neuroinflammatory responses to traumatic brain injury: etiology,  
441 clinical consequences, and therapeutic opportunities. *Neuropsychiatric disease and*  
442 *treatment* **11**, 97-106, doi:10.2147/NDT.S65815 (2015).
- 443 21 Perry, V. H. & Holmes, C. Microglial priming in neurodegenerative disease. *Nat Rev*  
444 *Neurol* **10**, 217-224, doi:10.1038/nrneurol.2014.38 (2014).
- 445 22 Henry, C. J., Huang, Y., Wynne, A. M. & Godbout, J. P. Peripheral lipopolysaccharide  
446 (LPS) challenge promotes microglial hyperactivity in aged mice that is associated with  
447 exaggerated induction of both pro-inflammatory IL-1beta and anti-inflammatory IL-10  
448 cytokines. *Brain Behav Immun* **23**, 309-317, doi:10.1016/j.bbi.2008.09.002 (2009).
- 449 23 Johnson, V. E. *et al.* Inflammation and white matter degeneration persist for years after  
450 a single traumatic brain injury. *Brain* **136**, 28-42, doi:10.1093/brain/aws322 (2013).

- 451 24 Field, R., Champion, S., Warren, C., Murray, C. & Cunningham, C. Systemic challenge with  
452 the TLR3 agonist poly I:C induces amplified IFNalpha/beta and IL-1beta responses in the  
453 diseased brain and exacerbates chronic neurodegeneration. *Brain Behav Immun* **24**,  
454 996-1007, doi:10.1016/j.bbi.2010.04.004 (2010).
- 455 25 Ohmoto, Y. *et al.* Variation in the immune response to adenoviral vectors in the brain:  
456 influence of mouse strain, environmental conditions and priming. *Gene Ther* **6**, 471-481,  
457 doi:10.1038/sj.gt.3300851 (1999).
- 458 26 McColl, B. W., Rothwell, N. J. & Allan, S. M. Systemic inflammatory stimulus potentiates  
459 the acute phase and CXC chemokine responses to experimental stroke and exacerbates  
460 brain damage via interleukin-1- and neutrophil-dependent mechanisms. *The Journal of*  
461 *neuroscience : the official journal of the Society for Neuroscience* **27**, 4403-4412,  
462 doi:10.1523/JNEUROSCI.5376-06.2007 (2007).
- 463 27 Schroder, K., Sweet, M. J. & Hume, D. A. Signal integration between IFNgamma and TLR  
464 signalling pathways in macrophages. *Immunobiology* **211**, 511-524,  
465 doi:10.1016/j.imbio.2006.05.007 (2006).
- 466 28 Muccigrosso, M. M. *et al.* Cognitive deficits develop 1month after diffuse brain injury  
467 and are exaggerated by microglia-associated reactivity to peripheral immune challenge.  
468 *Brain Behav Immun* **54**, 95-109, doi:10.1016/j.bbi.2016.01.009 (2016).
- 469 29 Weil, Z. M., Gaier, K. R. & Karelina, K. Injury timing alters metabolic, inflammatory and  
470 functional outcomes following repeated mild traumatic brain injury. *Neurobiol Dis* **70**,  
471 108-116, doi:10.1016/j.nbd.2014.06.016 (2014).
- 472 30 Foris, L. A. & Donnally, I. C. in *StatPearls* (2017).
- 473 31 Nikodemova, M. & Watters, J. J. Efficient isolation of live microglia with preserved  
474 phenotypes from adult mouse brain. *Journal of neuroinflammation* **9**, 147,  
475 doi:10.1186/1742-2094-9-147 (2012).
- 476 32 Bedi, S. S., Smith, P., Hetz, R. A., Xue, H. & Cox, C. S. Immunomagnetic enrichment and  
477 flow cytometric characterization of mouse microglia. *Journal of neuroscience methods*  
478 **219**, 176-182, doi:10.1016/j.jneumeth.2013.07.017 (2013).
- 479 33 Gordon, R. *et al.* A simple magnetic separation method for high-yield isolation of pure  
480 primary microglia. *Journal of neuroscience methods* **194**, 287-296,  
481 doi:10.1016/j.jneumeth.2010.11.001 (2011).
- 482 34 Turtzo, L. C. *et al.* Macrophagic and microglial responses after focal traumatic brain  
483 injury in the female rat. *Journal of neuroinflammation* **11**, 82, doi:10.1186/1742-2094-  
484 11-82 (2014).
- 485 35 Trahanas, D. M., Cuda, C. M., Perlman, H. & Schwulst, S. J. Differential Activation of  
486 Infiltrating Monocyte-Derived Cells After Mild and Severe Traumatic Brain Injury. *Shock*  
487 **43**, 255-260, doi:10.1097/SHK.0000000000000291 (2015).
- 488 36 Noristani, H. N. *et al.* RNA-Seq Analysis of Microglia Reveals Time-Dependent Activation  
489 of Specific Genetic Programs following Spinal Cord Injury. *Front Mol Neurosci* **10**, 90,  
490 doi:10.3389/fnmol.2017.00090 (2017).
- 491 37 Matcovitch-Natan, O. *et al.* Microglia development follows a stepwise program to  
492 regulate brain homeostasis. *Science* **353**, aad8670, doi:10.1126/science.aad8670 (2016).
- 493 38 Makinde, H. M., Cuda, C. M., Just, T. B., Perlman, H. R. & Schwulst, S. J. Nonclassical  
494 Monocytes Mediate Secondary Injury, Neurocognitive Outcome, and Neutrophil

- 495 Infiltration after Traumatic Brain Injury. *J Immunol* **199**, 3583-3591,  
496 doi:10.4049/jimmunol.1700896 (2017).
- 497 39 Schwarzmaier, S. M. & Plesnila, N. Contributions of the immune system to the  
498 pathophysiology of traumatic brain injury - evidence by intravital microscopy. *Frontiers*  
499 *in cellular neuroscience* **8**, 358, doi:10.3389/fncel.2014.00358 (2014).
- 500 40 de Rivero Vaccari, J. P., Dietrich, W. D. & Keane, R. W. Activation and regulation of  
501 cellular inflammasomes: gaps in our knowledge for central nervous system injury.  
502 *Journal of cerebral blood flow and metabolism : official journal of the International*  
503 *Society of Cerebral Blood Flow and Metabolism* **34**, 369-375,  
504 doi:10.1038/jcbfm.2013.227 (2014).
- 505 41 Edwards, P. *et al.* Final results of MRC CRASH, a randomised placebo-controlled trial of  
506 intravenous corticosteroid in adults with head injury-outcomes at 6 months. *Lancet* **365**,  
507 1957-1959, doi:10.1016/S0140-6736(05)66552-X (2005).
- 508 42 Roberts, I. *et al.* Effect of intravenous corticosteroids on death within 14 days in 10008  
509 adults with clinically significant head injury (MRC CRASH trial): randomised placebo-  
510 controlled trial. *Lancet* **364**, 1321-1328, doi:10.1016/S0140-6736(04)17188-2 (2004).
- 511 43 Wei, H. H. *et al.* NNZ-2566 treatment inhibits neuroinflammation and pro-inflammatory  
512 cytokine expression induced by experimental penetrating ballistic-like brain injury in  
513 rats. *Journal of neuroinflammation* **6**, 19, doi:10.1186/1742-2094-6-19 (2009).
- 514 44 Cao, T., Thomas, T. C., Ziebell, J. M., Pauly, J. R. & Lifshitz, J. Morphological and genetic  
515 activation of microglia after diffuse traumatic brain injury in the rat. *Neuroscience* **225**,  
516 65-75, doi:10.1016/j.neuroscience.2012.08.058 (2012).
- 517 45 Krasemann, S. *et al.* The TREM2-APOE Pathway Drives the Transcriptional Phenotype of  
518 Dysfunctional Microglia in Neurodegenerative Diseases. *Immunity* **47**, 566-581 e569,  
519 doi:10.1016/j.immuni.2017.08.008 (2017).
- 520 46 Boulanger, L. M. *et al.* Cellular and molecular characterization of a brain-enriched  
521 protein tyrosine phosphatase. *The Journal of neuroscience : the official journal of the*  
522 *Society for Neuroscience* **15**, 1532-1544 (1995).
- 523 47 Lombroso, P. J., Naegle, J. R., Sharma, E. & Lerner, M. A protein tyrosine phosphatase  
524 expressed within dopaminergic neurons of the basal ganglia and related structures.  
525 *The Journal of neuroscience : the official journal of the Society for Neuroscience* **13**,  
526 3064-3074 (1993).
- 527 48 Bliss, T. V. & Collingridge, G. L. A synaptic model of memory: long-term potentiation in  
528 the hippocampus. *Nature* **361**, 31-39, doi:10.1038/361031a0 (1993).
- 529 49 Silva, A. J. Molecular and cellular cognitive studies of the role of synaptic plasticity in  
530 memory. *J Neurobiol* **54**, 224-237, doi:10.1002/neu.10169 (2003).
- 531 50 Braithwaite, S. P. *et al.* Regulation of NMDA receptor trafficking and function by striatal-  
532 enriched tyrosine phosphatase (STEP). *The European journal of neuroscience* **23**, 2847-  
533 2856, doi:10.1111/j.1460-9568.2006.04837.x (2006).
- 534 51 Chin, J. *et al.* Fyn kinase induces synaptic and cognitive impairments in a transgenic  
535 mouse model of Alzheimer's disease. *The Journal of neuroscience : the official journal of*  
536 *the Society for Neuroscience* **25**, 9694-9703, doi:10.1523/JNEUROSCI.2980-05.2005  
537 (2005).

- 538 52 Kurup, P. *et al.* Abeta-mediated NMDA receptor endocytosis in Alzheimer's disease  
539 involves ubiquitination of the tyrosine phosphatase STEP61. *The Journal of neuroscience*  
540 : *the official journal of the Society for Neuroscience* **30**, 5948-5957,  
541 doi:10.1523/JNEUROSCI.0157-10.2010 (2010).
- 542 53 Zhang, Y. *et al.* Genetic reduction of striatal-enriched tyrosine phosphatase (STEP)  
543 reverses cognitive and cellular deficits in an Alzheimer's disease mouse model.  
544 *Proceedings of the National Academy of Sciences of the United States of America* **107**,  
545 19014-19019, doi:10.1073/pnas.1013543107 (2010).
- 546 54 Zhang, Y. *et al.* Reduced levels of the tyrosine phosphatase STEP block beta amyloid-  
547 mediated GluA1/GluA2 receptor internalization. *Journal of neurochemistry* **119**, 664-  
548 672, doi:10.1111/j.1471-4159.2011.07450.x (2011).
- 549 55 Gold, J. M. & Harvey, P. D. Cognitive deficits in schizophrenia. *Psychiatr Clin North Am*  
550 **16**, 295-312 (1993).
- 551 56 Bourne, C., Clayton, C., Murch, A. & Grant, J. Cognitive impairment and behavioural  
552 difficulties in patients with Huntington's disease. *Nurs Stand* **20**, 41-44,  
553 doi:10.7748/ns2006.05.20.35.41.c4146 (2006).
- 554 57 Anderson, C. A. & Arciniegas, D. B. Cognitive sequelae of hypoxic-ischemic brain injury: a  
555 review. *NeuroRehabilitation* **26**, 47-63, doi:10.3233/NRE-2010-0535 (2010).
- 556 58 Ginhoux, F. *et al.* Fate mapping analysis reveals that adult microglia derive from  
557 primitive macrophages. *Science* **330**, 841-845, doi:10.1126/science.1194637 (2010).
- 558 59 Schulz, C. *et al.* A lineage of myeloid cells independent of Myb and hematopoietic stem  
559 cells. *Science* **336**, 86-90, doi:10.1126/science.1219179 (2012).
- 560 60 Gomez Perdiguero, E., Schulz, C. & Geissmann, F. Development and homeostasis of  
561 "resident" myeloid cells: the case of the microglia. *Glia* **61**, 112-120,  
562 doi:10.1002/glia.22393 (2013).
- 563 61 Butovsky, O. *et al.* Identification of a unique TGF-beta-dependent molecular and  
564 functional signature in microglia. *Nature neuroscience* **17**, 131-143, doi:10.1038/nn.3599  
565 (2014).
- 566 62 Lavin, Y. *et al.* Tissue-resident macrophage enhancer landscapes are shaped by the local  
567 microenvironment. *Cell* **159**, 1312-1326, doi:10.1016/j.cell.2014.11.018 (2014).
- 568 63 Ajami, B., Bennett, J. L., Krieger, C., Tetzlaff, W. & Rossi, F. M. Local self-renewal can  
569 sustain CNS microglia maintenance and function throughout adult life. *Nature*  
570 *neuroscience* **10**, 1538-1543, doi:10.1038/nn2014 (2007).
- 571 64 Aguzzi, A., Barres, B. A. & Bennett, M. L. Microglia: scapegoat, saboteur, or something  
572 else? *Science* **339**, 156-161, doi:10.1126/science.1227901 (2013).
- 573 65 Ajami, B., Bennett, J. L., Krieger, C., McNagny, K. M. & Rossi, F. M. Infiltrating monocytes  
574 trigger EAE progression, but do not contribute to the resident microglia pool. *Nature*  
575 *neuroscience* **14**, 1142-1149, doi:10.1038/nn.2887 (2011).
- 576 66 Zeisel, A. *et al.* Brain structure. Cell types in the mouse cortex and hippocampus  
577 revealed by single-cell RNA-seq. *Science* **347**, 1138-1142, doi:10.1126/science.aaa1934  
578 (2015).
- 579 67 Goebel-Goody, S. M. *et al.* Genetic manipulation of STEP reverses behavioral  
580 abnormalities in a fragile X syndrome mouse model. *Genes Brain Behav* **11**, 586-600,  
581 doi:10.1111/j.1601-183X.2012.00781.x (2012).

- 582 68 Poddar, R., Deb, I., Mukherjee, S. & Paul, S. NR2B-NMDA receptor mediated modulation  
583 of the tyrosine phosphatase STEP regulates glutamate induced neuronal cell death.  
584 *Journal of neurochemistry* **115**, 1350-1362, doi:10.1111/j.1471-4159.2010.07035.x  
585 (2010).
- 586 69 Grabert, K. *et al.* Microglial brain region-dependent diversity and selective regional  
587 sensitivities to aging. *Nat Neurosci* **19**, 504-516, doi:10.1038/nn.4222 (2016).
- 588 70 Dobin, A. *et al.* STAR: ultrafast universal RNA-seq aligner. *Bioinformatics* **29**, 15-21,  
589 doi:10.1093/bioinformatics/bts635 (2013).
- 590 71 Eden, E., Navon, R., Steinfeld, I., Lipson, D. & Yakhini, Z. GOrilla: a tool for discovery and  
591 visualization of enriched GO terms in ranked gene lists. *BMC Bioinformatics* **10**, 48,  
592 doi:10.1186/1471-2105-10-48 (2009).  
593

## 594 **Author Contributions**

595 S.S and H.M wrote the main manuscript text and prepared all figures. H.M, T.J  
596 and S.S carried out the experiments. H.M and D.W performed the computational analysis  
597 of the sequencing data.  
598
